# Supplementary material
Source: PubMed Central journal article supplement (PMC7213805)
Supplement: jciinsight-5-134852-s219.pdf [file jciinsight-5-134852-s219.pdf]

Supplementary Table 1: MNI coordinates and respiratory outcome for stimulated sites shown in Fig. 6

| Patient Number | MNI <sub>x</sub> | MNI <sub>y</sub> | MNI <sub>z</sub>    | Electrode and Contact Number | Result          |
|----------------|------------------|------------------|---------------------|------------------------------|-----------------|
| P381           | -16.03           | -0.95            | -22.28              | Left Amygdala 1              | Apnea           |
|                | -19.46           | -0.37            | -22.41              | Left Amygdala 2              |                 |
|                | -19.46           | -0.37            | -22.41              | Left Amygdala 2              | Transient Apnea |
|                | -23.49           | -0.2             | -22.63              | Left Amygdala 3              |                 |
|                | -23.49           | -0.2             | -22.63              | Left Amygdala 3              | No Apnea        |
|                | -27.61           | -0.16            | -22.97              | Left Amygdala 4              |                 |
|                | -27.61           | -0.16            | -22.97              | Left Amygdala 4              | No Apnea        |
|                | -32.42           | 0.07             | -23.21              | Left Amygdala 5              |                 |
|                | -32.42           | 0.07             | -23.21              | Left Amygdala 5              | No Apnea        |
| -36.29         | -1.02            | -23.29           | Left Amygdala 6     |                              |                 |
| P395           | -10.27           | -1.81            | -22.19              | Left Amygdala 1              | No Apnea        |
|                | -12.29           | -2.13            | -21.24              | Left Amygdala 2              |                 |
|                | -12.29           | -2.13            | -21.24              | Left Amygdala 2              | Apnea           |
|                | -14.56           | -2.41            | -20.51              | Left Amygdala 3              |                 |
|                | -14.56           | -2.41            | -20.51              | Left Amygdala 3              | Apnea           |
|                | -16.69           | -2.84            | -19.78              | Left Amygdala 4              |                 |
|                | -16.69           | -2.84            | -19.78              | Left Amygdala 4              | Apnea           |
|                | -19.52           | -3.19            | -19.65              | Left Amygdala 5              |                 |
|                | -22.42           | -3.52            | -19.95              | Left Amygdala 6              | Apnea           |
|                | -22.42           | -3.52            | -19.95              | Left Amygdala 6              |                 |
|                | -25.08           | -4.06            | -20.26              | Left Amygdala 7              | Transient Apnea |
|                | -25.08           | -4.06            | -20.26              | Left Amygdala 7              |                 |
|                | -27.49           | -4.43            | -20.41              | Left Amygdala 8              | Transient Apnea |
|                | -27.49           | -4.43            | -20.41              | Left Amygdala 8              |                 |
|                | -22.25           | -32.46           | -10.59              | Left Hippocampus 1           | No Apnea        |
|                | -27.32           | -31.01           | -10.14              | Left Hippocampus 2           |                 |
| -27.32         | -31.01           | -10.14           | Left Hippocampus 2  | No Apnea                     |                 |
| -32.91         | -29.9            | -9.33            | Left Hippocampus 3  |                              |                 |
| P407           | 16.28            | -6.57            | -21.27              | Right Amygdala 4             | Apnea           |
|                | 18.73            | -6.58            | -21.15              | Right Amygdala 5             |                 |
| P412           | -23.13           | 0.08             | -23.05              | Left Amygdala 1              | Transient Apnea |
|                | -25.7            | -0.41            | -22.57              | Left Amygdala 2              |                 |
|                | -37.79           | -1.55            | -21.3               | Left Amygdala 7              | No Apnea        |
|                | -40.38           | -1.69            | -21.12              | Left Amygdala 8              |                 |
| P422           | 15.12            | -3.89            | -24.38              | Right Amygdala 3             | Apnea           |
|                | 18.15            | -4.53            | -23.87              | Right Amygdala 4             |                 |
|                | 18.15            | -4.53            | -23.87              | Right Amygdala 4             | Apnea           |
|                | 21.48            | -4.98            | -23.43              | Right Amygdala 5             |                 |
|                | 21.48            | -4.98            | -23.43              | Right Amygdala 5             | Apnea           |
|                | 24.6             | -5.1             | -22.99              | Right Amygdala 6             |                 |
|                | 24.6             | -5.1             | -22.99              | Right Amygdala 6             | Transient Apnea |
|                | 27.41            | -5.07            | -22.46              | Right Amygdala 7             |                 |
|                | 25.43            | -18.21           | -18.26              | Right Hippocampus 2          | No Apnea        |
| 30.78          | -18.77           | -17.83           | Right Hippocampus 3 |                              |                 |
| P427           | 14.75            | -8.42            | -19.09              | Right Amygdala 2             | Apnea           |
|                | 17.15            | -9.04            | -18.52              | Right Amygdala 3             |                 |
|                |                  |                  |                     |                              |                 |

|        |        |        |                    |                     |                 |
|--------|--------|--------|--------------------|---------------------|-----------------|
|        | -14.66 | -6.42  | -23.38             | Left Amygdala 3     | Apnea           |
|        | -16.93 | -6.78  | -23.23             | Left Amygdala 4     |                 |
|        | -16.93 | -6.78  | -23.23             | Left Amygdala 4     | Apnea           |
|        | -19.22 | -7.17  | -23.04             | Left Amygdala 5     |                 |
|        | -19.22 | -7.17  | -23.04             | Left Amygdala 5     | Transient Apnea |
|        | -21.51 | -7.51  | -22.84             | Left Amygdala 6     |                 |
|        | 14.64  | -13.65 | -22.29             | Left Hippocampus 1  | No Apnea        |
|        | 20.68  | -14.38 | -20.99             | Left Hippocampus 2  |                 |
|        | 20.68  | -14.38 | -20.99             | Left Hippocampus 2  | No Apnea        |
| 26.21  | -15.21 | -20.12 | Left Hippocampus 3 |                     |                 |
| P447   | -13.12 | -11.26 | -18.16             | Left Amygdala 1     | No Apnea        |
|        | -15.86 | -10.92 | -17.51             | Left Amygdala 2     |                 |
|        | -15.86 | -10.92 | -17.51             | Left Amygdala 2     | Transient Apnea |
|        | -18.7  | -10.51 | -17.02             | Left Amygdala 3     |                 |
|        | -18.7  | -10.51 | -17.02             | Left Amygdala 3     | Apnea           |
|        | -21.66 | -9.73  | -16.7              | Left Amygdala 4     |                 |
|        | -21.66 | -9.73  | -16.7              | Left Amygdala 4     | No Apnea        |
|        | -24.66 | -8.64  | -16.52             | Left Amygdala 5     |                 |
|        | -24.66 | -8.64  | -16.52             | Left Amygdala 5     | No Apnea        |
|        | -27.56 | -7.67  | -16.52             | Left Amygdala 6     |                 |
|        | -27.56 | -7.67  | -16.52             | Left Amygdala 6     | No Apnea        |
|        | -30.29 | -7.06  | -16.78             | Left Amygdala 7     |                 |
|        | 14.34  | 0.41   | -17.71             | Right Amygdala 1    | Apnea           |
|        | 17.18  | 0.67   | -17.22             | Right Amygdala 2    |                 |
|        | 17.18  | 0.67   | -17.22             | Right Amygdala 2    | Apnea           |
|        | 19.93  | 1.05   | -16.92             | Right Amygdala 3    |                 |
|        | 19.93  | 1.05   | -16.92             | Right Amygdala 3    | No Apnea        |
|        | 22.4   | 1.6    | -16.82             | Right Amygdala 4    |                 |
|        | 22.4   | 1.6    | -16.82             | Right Amygdala 4    | No Apnea        |
|        | 24.67  | 2.29   | -16.95             | Right Amygdala 5    |                 |
|        | 24.67  | 2.29   | -16.95             | Right Amygdala 5    | No Apnea        |
|        | 27.12  | 2.95   | -17.47             | Right Amygdala 6    |                 |
|        | 27.12  | 2.95   | -17.47             | Right Amygdala 6    | No Apnea        |
| 29.83  | 3.64   | -18.31 | Right Amygdala 7   |                     |                 |
| -24.03 | -30.72 | -8.64  | Left Hippocampus 1 | No Apnea            |                 |
| -29.88 | -29.2  | -9.5   | Left Hippocampus 2 |                     |                 |
| P466   | -16.31 | -2.81  | -21.26             | Left Amygdala 1     | Apnea           |
|        | -18.47 | -2.88  | -21.68             | Left Amygdala 2     |                 |
|        | -29.16 | -2.21  | -23.2              | Left Amygdala 7     | No Apnea        |
|        | -31.42 | -1.44  | -23.34             | Left Amygdala 8     |                 |
|        | 19.87  | -5.47  | -21.55             | Right Amygdala 1    | Apnea           |
|        | 22.38  | -5.45  | -21.77             | Right Amygdala 2    |                 |
|        | 23.74  | -25.97 | -15.29             | Right Hippocampus 1 | No Apnea        |
|        | 28.06  | -24.08 | -14.75             | Right Hippocampus 2 |                 |

Supplementary Table 2: Overlap of transient apnea and apnea (**AIR site**) regions with amygdala nuclei

| Amygdala nucleus | Proportion of nucleus contained in Transient Apnea region | Proportion of nucleus contained in Apnea region ( <b>AIR site</b> ) |
|------------------|-----------------------------------------------------------|---------------------------------------------------------------------|
| AAA              | 0                                                         | 0                                                                   |
| ASTA             | 0                                                         | 0                                                                   |
| ATA              | 0                                                         | 0.729                                                               |
| BL*              | 0.269                                                     | 0.475                                                               |
| BM               | 0                                                         | 0.367                                                               |
| CEN              | 0                                                         | 0                                                                   |
| CMN              | 0                                                         | 0.335                                                               |
| La               | 0.227                                                     | 0                                                                   |
| Other**          | 0.015                                                     | 0                                                                   |

Values are the proportion of the given amygdala nucleus volume, indicated by row, overlapping the given transient apnea and apnea subregion volume, indicated by column. Volumes are obtained by thresholding the respective probability maps at 0.5. Area "BL" (\*) consists of CIT labeled regions "BLN\_BLD+BLI" and "AMY\_BL\_BLV." Area "Other" (\*\*) is CIT labeled region "AMY"
